# Supplementary material
Source: PubMed Central journal article supplement (PMC3318843)
Supplement: supp_78.8.2896_AEM7336-11_TableS1.pdf [file supp_78.8.2896_AEM7336-11_TableS1.pdf]

**Supplemental Table S1.** The list of the primers used for qRT-PCR.

| Gene ID                                                              | Gene name                                                                  | Forward primer (5' → 3') | Reverse primer (5' → 3')   |
|----------------------------------------------------------------------|----------------------------------------------------------------------------|--------------------------|----------------------------|
| <b>Genes selected to confirm the microarray data</b>                 |                                                                            |                          |                            |
| bl17025                                                              | hypothetical protein                                                       | TCCCGGCATTGGTGAACCTTGT   | TCGGTGCAAGGTAGGTCTCGAT     |
| blr0497                                                              | hypothetical protein                                                       | AGCAGGCCTTATCCCATCGTTCA  | AGCTGCCGCATTTTCGTTTCATCT   |
| bl12758                                                              | two-component response regulator                                           | TTTGCCGTGCGGACCTTCA      | TTTCGCCGTCCGATTTACGCA      |
| bl11474                                                              | malate synthase G ( <i>gleB</i> )                                          | AGCTGTCCGACATCCTCACCATT  | GCAGTTGTTGTCGATCTCCTGCT    |
| bl14867                                                              | putative outer-membrane immunogenic protein precursor                      | AAGTACGAAGTCTTCAGCACGGC  | AGATGTGGTTGTACTIONCGACGCCA |
| blr2455                                                              | isocitrate lyase ( <i>aceA</i> )                                           | ACAACAACCTCGCCGTCGTTCAA  | TTGTACTTGCTGACGTCCTTGCC    |
| bl15155                                                              | hypothetical protein                                                       | TACGGGAAAGAGCAGTTCGAGCA  | TCTCGACGAAGGACTTGGTGTCT    |
| blr0906                                                              | nodulation ATP-binding protein I ( <i>nodI</i> )                           | TTTCGGTCATGTCGGCCAATGT   | TTGAAGCTTTGTCGTTCCCGGT     |
| <b>Genes selected for confirmation of <i>nod</i> gene expression</b> |                                                                            |                          |                            |
| bl12023                                                              | transcriptional regulatory protein LysR family ( <i>nodD<sub>1</sub></i> ) | ACGGCCTGAGGAGACGAATTGA   | TTGGATGATCCGCAACGGCAT      |
| blr2025                                                              | acyl transferase ( <i>nodA</i> )                                           | ACTGCGCCGCTTCATCAAAGTT   | TCCTGGAGTGCGGGATACATCA     |
| blr2026                                                              | nodulation chito-oligosaccharide deacetylase ( <i>nodB</i> )               | ACCTTTGACGATGGGCCAAATCC  | ATGCCCTTCCGCAATCATTCGT     |
| blr2027                                                              | chitin synthase ( <i>nodC</i> )                                            | CCCATTGCTCCTCGCCATTTTCAT | TTGCAGCAATCGTCAATCCCGT     |
| bl14952                                                              | NfeD protein homolog ( <i>nfeD</i> )                                       | AAGGACAAGAAGGACGGTGACCA  | ACGGATGAAAGCAACCGCATCA     |
| bl12757                                                              | transcriptional regulatory protein Crp family ( <i>fixK<sub>2</sub></i> )  | TCAACACCCAAATCGGTGGCAA   | TCCTTGCGGTAGGAGAATTCGGT    |
| blr4488                                                              | two-component response regulator ( <i>ntrC</i> )                           | CCGAATTTGCCCGTCATCGTCAT  | ATGGCGATCAGCTCCTTCAGGT     |
| <b>Gene used to normalize qRT-PCR data (housekeeping gene)</b>       |                                                                            |                          |                            |
| bl17457                                                              | histidyl-tRNA synthetase ( <i>hisS</i> )                                   | GATGGAATACACCGACGCGCT    | AACGCAAGCTAATCCACTGCTCG    |
