# Supplementary material
Source: PubMed Central journal article supplement (PMC3318843)
Supplement: supp_78.8.2896_AEM7336-11_TableS2.pdf [file supp_78.8.2896_AEM7336-11_TableS2.pdf]

**Supplemental Table S2. Functional classification of genes differentially expressed by coumestrol (20 µM, 24 h)**

The cut-off threshold was 2-fold with q value less than 5%.

Positive values in fold change indicate up-regulation while negative values indicate down-regulation.

Functional levels were adopted from the rhizobase (<http://genome.kazusa.or.jp/rhizobase/Bradyrhizobium/genes/category>).

| Locus ID | Fold Change | q-value(%) | Functional Level I                                         | Functional Level II                                       | Functional Level III (Description)                             |
|----------|-------------|------------|------------------------------------------------------------|-----------------------------------------------------------|----------------------------------------------------------------|
| bll4682  | -2.49       | 0.00       | Amino Acid Biosynthesis                                    | Serine Family/Sulfur Assimilation                         | cysteine synthase                                              |
| bll1474  | -2.67       | 0.00       | Amino Acid Biosynthesis                                    | Branched Chain Family                                     | malate synthase G                                              |
| blr2308  | +7.91       | 0.00       | Biosynthesis of cofactors, prosthetic groups, and carriers | Molybdopterin                                             | putative molybdopterin biosynthesis protein                    |
| blr3510  | +3.60       | 0.00       | Biosynthesis of cofactors, prosthetic groups, and carriers | Thioredoxin, glutaredoxin, and glutathione                | probable thioredoxin                                           |
| blr3265  | +2.11       | 0.00       | Biosynthesis of cofactors, prosthetic groups, and carriers | Cobalamin, heme, phycobillin and porphyrin                | precorrin isomerase                                            |
| bll0532  | -2.75       | 0.00       | Biosynthesis of cofactors, prosthetic groups, and carriers | Others                                                    | 4a-hydroxytetrahydrobiopterin dehydratase                      |
| bll8020  | -3.00       | 0.00       | Biosynthesis of cofactors, prosthetic groups, and carriers | Menaquinone and ubiquinone                                | putative ubiquinone/menaquinone biosynthesis methyltransferase |
| bll1419  | -5.52       | 0.00       | Biosynthesis of cofactors, prosthetic groups, and carriers | Folic acid                                                | 5,10-methylenetetrahydrofolate reductase                       |
| blr1214  | +2.90       | 0.00       | Cell envelope                                              | Cell envelope                                             | putative lipoprotein                                           |
| bll7116  | +2.11       | 0.00       | Cell envelope                                              | Membranes, lipoproteins and porins                        | aquaporin                                                      |
| bll4853  | -2.16       | 0.00       | Cell envelope                                              | Membranes, lipoproteins and porins                        | putative outer membrane protein                                |
| blr5156  | -2.25       | 0.00       | Cell envelope                                              | Murein sacculus and peptidoglycan                         | putative D-alanyl-D-alanine carboxypeptidase                   |
| blr7695  | -2.49       | 0.00       | Cell envelope                                              | Membranes, lipoproteins and porins                        | putative outer-membrane immunogenic protein precursor          |
| bll7469  | -2.49       | 0.00       | Cell envelope                                              | Membranes, lipoproteins and porins                        | putative outer-membrane immunogenic protein precursor          |
| blr4701  | -2.57       | 0.00       | Cell envelope                                              | Membranes, lipoproteins and porins                        | putative outer-membrane immunogenic protein precursor          |
| bll2379  | -2.75       | 0.00       | Cell envelope                                              | Surface polysaccharides, lipopolysaccharides and antigens | putative polysaccharide export protein                         |
| bll4867  | -3.68       | 0.00       | Cell envelope                                              | Membranes, lipoproteins and porins                        | putative outer-membrane immunogenic protein precursor          |
| bll6888  | -4.49       | 0.00       | Cell envelope                                              | Membranes, lipoproteins and porins                        | putative porin                                                 |
| blr4637  | +2.85       | 0.00       | Cellular processes                                         | Chaperones                                                | probable HspC2 heat shock protein                              |
| bll0729  | +2.27       | 0.00       | Cellular processes                                         | Chaperones                                                | small heat shock protein                                       |
| bll7385  | +2.25       | 0.00       | Cellular processes                                         | Cell division                                             | putative partition protein                                     |
| blr5698  | +2.07       | 0.00       | Cellular processes                                         | Protein and peptide secretion                             | similar to protein-export membrane protein SecD                |
| bll0473  | +2.07       | 0.00       | Cellular processes                                         | Cell division                                             | probable cell division protein                                 |
| blr0638  | -2.04       | 0.00       | Cellular processes                                         | Cell division                                             | Maf-like protein                                               |
| bsl0059  | -2.09       | 0.00       | Cellular processes                                         | Chaperones                                                | cold shock protein                                             |
| bsl6587  | -2.16       | 0.00       | Cellular processes                                         | Chemotaxis                                                | components of type IV pilus pilin subunit                      |
| blr0481  | -2.20       | 0.00       | Cellular processes                                         | Protein and peptide secretion                             | signal recognition particle protein                            |
| bsl4127  | -2.30       | 0.00       | Cellular processes                                         | Chaperones                                                | cold shock protein                                             |
| bsl7141  | -2.37       | 0.00       | Cellular processes                                         | Chemotaxis                                                | components of type IV pilus pilin subunit                      |
| bll7954  | -2.57       | 0.00       | Cellular processes                                         | Chemotaxis                                                | putative methyl accepting chemotaxis protein                   |
| bll2757  | +8.37       | 0.00       | Central intermediary metabolism                            | Nitrogen fixation                                         | transcriptional regulatory protein                             |
| blr1746  | +4.11       | 0.00       | Central intermediary metabolism                            | Nitrogen fixation                                         | nitrogenase molybdenum-cofactor synthesis protein              |
| bll5665  | +2.86       | 0.00       | Central intermediary metabolism                            | Other                                                     | putative carbon monoxide dehydrogenase small subunit           |
| blr1457  | +2.26       | 0.00       | Central intermediary metabolism                            | Other                                                     | urease alpha subunit                                           |
| blr4488  | +2.07       | 0.05       | Central intermediary metabolism                            | Nitrogen fixation                                         | two-component response regulator                               |
| bsr2765  | +2.01       | 0.00       | Central intermediary metabolism                            | Nitrogen fixation                                         | cbb3 oxidase subunit IV                                        |
| blr8272  | -2.08       | 0.00       | Central intermediary metabolism                            | Polysaccharides and glycoproteins                         | probable phosphoglucomutase phosphomannomutase protein         |
| blr7759  | -2.17       | 0.00       | Central intermediary metabolism                            | Other                                                     | ornithine decarboxylase                                        |
| bll3968  | -2.27       | 0.00       | Central intermediary metabolism                            | Other                                                     | carbon monoxide dehydrogenase large chain                      |
| bll4072  | 3.15        | 0.00       | DNA replication, recombination, and repair                 |                                                           | replicative DNA helicase                                       |
| bll1113  | 2.61        | 0.00       | DNA replication, recombination, and repair                 |                                                           | methylated-DNA--protein-cysteine methyltransferase             |
| bll6773  | -2.05       | 0.00       | DNA replication, recombination, and repair                 |                                                           | probable DNA ligase                                            |
| blr8051  | -2.23       | 0.00       | DNA replication, recombination, and repair                 |                                                           | putative excinuclease ABC subunit A                            |
| bll4517  | -2.29       | 0.00       | DNA replication, recombination, and repair                 |                                                           | probable DNA polymerase III delta prime subunit                |
| bll1530  | +2.71       | 0.05       | Energy metabolism                                          | Pyruvate and acetyl-CoA metabolism                        | putative aldehyde dehydrogenase protein                        |
| bll3784  | +2.18       | 0.00       | Energy metabolism                                          | Respiration                                               | cytochrome C oxidase                                           |
| blr3957  | +2.05       | 0.00       | Energy metabolism                                          | Amino acids and amines                                    | 3-hydroxyisobutyrate dehydrogenase                             |
| bll5913  | -2.15       | 0.00       | Energy metabolism                                          | Respiration                                               | cytochrome C                                                   |
| blr7544  | -2.21       | 0.00       | Energy metabolism                                          | Respiration                                               | cytochrome c550                                                |
| bll2651  | -2.47       | 0.00       | Energy metabolism                                          | Sugars                                                    | 1-deoxy-D-xylulose-5-phosphate synthase                        |
| blr2455  | -17.65      | 0.00       | Energy metabolism                                          | TCA cycle                                                 | isocitrate lyase                                               |
| blr5790  | +4.49       | 0.00       | Fatty acid, phospholipid and sterol metabolism             |                                                           | putative lignostilbene-alpha,beta-dioxygenase                  |
| bll1385  | +2.46       | 0.00       | Fatty acid, phospholipid and sterol metabolism             |                                                           | putative gamma carboxymuconolactone decarboxylase protein      |
| bll2655  | +2.24       | 0.00       | Fatty acid, phospholipid and sterol metabolism             |                                                           | putative enoyl-CoA hydratase protein                           |
| blr3433  | +2.21       | 0.00       | Fatty acid, phospholipid and sterol metabolism             |                                                           | putative crotonobetaine/carnitine-CoA ligase                   |
| bsl4577  | +2.05       | 0.00       | Fatty acid, phospholipid and sterol metabolism             |                                                           | gamma-carboxymuconolactone decarboxylase                       |
| bsl7784  | -2.10       | 0.00       | Fatty acid, phospholipid and sterol metabolism             |                                                           | probable acyl carrier protein                                  |
| bsr4084  | -2.17       | 0.00       | Fatty acid, phospholipid and sterol metabolism             |                                                           | acyl carrier protein                                           |
| bll5021  | -2.23       | 0.00       | Fatty acid, phospholipid and sterol metabolism             |                                                           | fatty acid/phospholipid synthesis protein                      |
| blr1512  | -5.07       | 0.00       | Fatty acid, phospholipid and sterol metabolism             |                                                           | putative cyclopropane-fatty-acyl-phospholipid synthase         |
| blr4264  | +2.43       | 0.00       | Purines, pyrimidines, nucleosides, and nucleotides         | Purine ribonucleotide biosynthesis                        | putative adenylate cyclase protein                             |
| blr8134  | -2.07       | 0.00       | Purines, pyrimidines, nucleosides, and nucleotides         | Pyrimidine ribonucleotide biosynthesis                    | Orotate phosphoribosyltransferase                              |
| bll4274  | -2.93       | 0.00       | Purines, pyrimidines, nucleosides, and nucleotides         | Purine ribonucleotide biosynthesis                        | ribonucleoside-diphosphate reductase 2 alpha chain             |
| bll2758  | +4.55       | 0.00       | Regulatory functions                                       |                                                           | two-component response regulator                               |
| blr4080  | +4.18       | 0.00       | Regulatory functions                                       |                                                           | transcriptional regulatory protein                             |
| bll7024  | +3.93       | 0.00       | Regulatory functions                                       |                                                           | transcriptional regulatory protein                             |
| bll3297  | +3.89       | 0.00       | Regulatory functions                                       |                                                           | putative monoamine oxidase regulatory protein                  |
| blr7084  | +2.50       | 0.00       | Regulatory functions                                       |                                                           | transcriptional regulatory protein                             |
| bll6061  | +2.24       | 0.00       | Regulatory functions                                       |                                                           | transcriptional regulatory protein                             |
| blr6291  | +2.10       | 0.00       | Regulatory functions                                       |                                                           | transcriptional regulatory protein                             |
| bll3466  | -2.04       | 0.00       | Regulatory functions                                       |                                                           | transcriptional regulatory protein                             |
| bll2200  | -2.11       | 0.00       | Regulatory functions                                       |                                                           | two-component response regulator                               |
| bll2786  | -2.38       | 0.00       | Regulatory functions                                       |                                                           | transcriptional regulatory protein                             |
| bll2599  | -2.38       | 0.00       | Regulatory functions                                       |                                                           | two-component hybrid sensor and regulator                      |
| bll4368  | -2.62       | 0.00       | Regulatory functions                                       |                                                           | transcriptional regulatory protein                             |
| bll3158  | -2.64       | 0.00       | Regulatory functions                                       |                                                           | transcriptional regulatory protein                             |
| blr0200  | -2.89       | 0.00       | Regulatory functions                                       |                                                           | transcriptional regulatory protein                             |
| bll4381  | -2.98       | 0.00       | Regulatory functions                                       |                                                           | transcriptional regulatory protein                             |
| bll7342  | -3.02       | 0.00       | Regulatory functions                                       |                                                           | two-component response regulator                               |
| bll4130  | -3.28       | 0.00       | Regulatory functions                                       |                                                           | transcriptional regulatory protein                             |
| bll7795  | -3.38       | 0.00       | Regulatory functions                                       |                                                           | two-component response regulator                               |
| blr2577  | -4.31       | 0.00       | Regulatory functions                                       |                                                           | transcriptional regulatory protein                             |
| blr5264  | -5.16       | 0.00       | Regulatory functions                                       |                                                           | two-component hybrid sensor and regulator                      |
| bll2648  | +2.33       | 0.00       | Transcription                                              | RNA synthesis, modification, and DNA transcription        | RNA methyltransferase                                          |
| blr4928  | +2.19       | 0.00       | Transcription                                              | RNA synthesis, modification, and DNA transcription        | ECF family sigma factor                                        |
| bll2628  | +2.04       | 0.00       | Transcription                                              | RNA synthesis, modification, and DNA transcription        | ECF family sigma factor                                        |
| bll5066  | -2.21       | 0.00       | Transcription                                              | RNA synthesis, modification, and DNA transcription        | RNA polymerase omega subunit                                   |
| blr7797  | -2.24       | 0.00       | Transcription                                              | RNA synthesis, modification, and DNA transcription        | RNA polymerase sigma-E factor (Sigma-24) protein               |
| bll1447  | -2.57       | 0.00       | Transcription                                              | RNA synthesis, modification, and DNA transcription        | dead-box ATP-dependent RNA helicase                            |
| blr0723  | -2.71       | 0.00       | Transcription                                              | RNA synthesis, modification, and DNA transcription        | RNA polymerase sigma-54 subunit                                |
| bll6031  | +4.11       | 0.00       | Translation                                                | Degradation of proteins, peptides, and glycopeptides      | putative zinc metalloendopeptidase                             |
| bsl5090  | +2.10       | 0.62       | Translation                                                | Aminoacyl tRNA synthetases and tRNA modification          | glutamyl-tRNA-Gln-amidotransferase chain C                     |
| bll7941  | +2.03       | 0.00       | Translation                                                | Degradation of proteins, peptides, and glycopeptides      | aminopeptidase                                                 |

|         |        |      |                                |                                                  |                                                     |
|---------|--------|------|--------------------------------|--------------------------------------------------|-----------------------------------------------------|
| blr0420 | -2.08  | 0.00 | Translation                    | Ribosomal proteins                               | 50S ribosomal protein L21                           |
| blI5378 | -2.10  | 0.00 | Translation                    | Ribosomal proteins                               | 30S ribosomal protein S13                           |
| blI4756 | -2.17  | 0.00 | Translation                    | Aminoacyl tRNA synthetases and tRNA modification | similar to arginyl-tRNA synthetase                  |
| bsr8096 | -2.34  | 0.00 | Translation                    | Ribosomal proteins                               | ribosomal protein L34                               |
| bsr5117 | -2.45  | 0.00 | Translation                    | Ribosomal proteins                               | 50S ribosomal protein L33                           |
| bsr7117 | -2.53  | 0.00 | Translation                    | Ribosomal proteins                               | 30S ribosomal protein S21                           |
| blr0365 | -2.83  | 0.00 | Translation                    | Ribosomal proteins                               | 30S ribosomal protein S21                           |
| blr1508 | +3.51  | 0.00 | Transport and binding proteins |                                                  | HlyB/MsbA family ABC transporter                    |
| blr3670 | +2.22  | 0.00 | Transport and binding proteins |                                                  | probable substrate-binding protein                  |
| blI1032 | +2.15  | 0.00 | Transport and binding proteins |                                                  | putative C4-dicarboxylate binding protein           |
| blI2304 | +2.03  | 0.00 | Transport and binding proteins |                                                  | probable ABC transporter, substrate binding protein |
| blr3840 | +2.03  | 0.00 | Transport and binding proteins |                                                  | C4-dicarboxylate transport protein                  |
| blr6447 | -2.02  | 0.00 | Transport and binding proteins |                                                  | ABC transporter ATP-binding protein                 |
| blr3743 | -2.03  | 0.00 | Transport and binding proteins |                                                  | periplasmic mannitol-binding protein                |
| blI6913 | -2.05  | 0.00 | Transport and binding proteins |                                                  | ABC transporter permease protein                    |
| blI7152 | -2.07  | 0.00 | Transport and binding proteins |                                                  | tolB protein                                        |
| blr7376 | -2.10  | 0.00 | Transport and binding proteins |                                                  | putative integral membrane transporter protein      |
| blI7103 | -2.21  | 0.00 | Transport and binding proteins |                                                  | ABC transporter permease protein                    |
| blr7839 | -2.33  | 0.00 | Transport and binding proteins |                                                  | probable substrate-binding protein                  |
| blI6620 | -2.42  | 0.00 | Transport and binding proteins |                                                  | ABC transporter HlyB/MsbA family                    |
| blr5804 | -2.63  | 0.00 | Transport and binding proteins |                                                  | ABC transporter ATP-binding protein                 |
| blr1483 | -2.97  | 0.00 | Transport and binding proteins |                                                  | sulfate ABC transporter permease protein            |
| blr6117 | -4.15  | 0.00 | Transport and binding proteins |                                                  | putative manganese transport protein                |
| blI3896 | +4.06  | 0.00 | Other categories               | Transposon-related functions                     | putative transposase                                |
| blr8217 | +3.64  | 0.00 | Other categories               | Transposon-related functions                     | putative transposase                                |
| blr3793 | +2.96  | 0.00 | Other categories               | Other                                            | putative lyase                                      |
| blI4952 | +2.95  | 0.00 | Other categories               | Symbiosis                                        | NfeD protein homolog                                |
| blI6274 | +2.92  | 0.00 | Other categories               | Other                                            | putative dehydrogenase                              |
| bsr1972 | +2.13  | 0.00 | Other categories               | Transposon-related functions                     | putative transposase                                |
| blI2434 | +2.08  | 0.00 | Other categories               | Other                                            | plasmid stability protein                           |
| blI6614 | +2.04  | 0.00 | Other categories               | Other                                            | putative esterase                                   |
| blr2776 | +2.04  | 0.00 | Other categories               | Other                                            | putative patatin-like phospholipase                 |
| blI2752 | -2.02  | 0.00 | Other categories               | Other                                            | probable glycosyl transferase                       |
| blI3346 | -2.05  | 0.00 | Other categories               | Other                                            | putative amidase                                    |
| blI3028 | -2.08  | 0.00 | Other categories               | Other                                            | putative oxidoreductase                             |
| blr3678 | -2.10  | 0.00 | Other categories               | Other                                            | putative oxidoreductase                             |
| blr4054 | -2.10  | 0.00 | Other categories               | Drug and analog sensitivity                      | tetracycline resistance protein                     |
| blr3294 | -2.10  | 0.00 | Other categories               | Other                                            | putative decarboxylase                              |
| blI5979 | -2.14  | 0.00 | Other categories               | Other                                            | putative CDP-glucose 4,6-dehydratase protein        |
| blr3092 | -2.19  | 0.00 | Other categories               | Other                                            | putative secreted protein                           |
| blr3742 | -2.26  | 0.00 | Other categories               | Drug and analog sensitivity                      | probable multidrug-resistance related protein       |
| blI0941 | -2.27  | 0.00 | Other categories               | Drug and analog sensitivity                      | beta-lactamase L2 precursor                         |
| blI1016 | -2.55  | 0.00 | Other categories               | Other                                            | probable peptidase                                  |
| blI6262 | -2.93  | 0.00 | Other categories               | Adaptations and atypical conditions              | probable osmotically inducible protein              |
| blI0333 | -4.48  | 0.00 | Other categories               | Other                                            | probable alcohol dehydrogenase precursor            |
| blr3679 | -5.08  | 0.00 | Other categories               | Other                                            | putative monooxygenase component                    |
| blr3677 | -7.41  | 0.00 | Other categories               | Other                                            | putative monooxygenase component                    |
| blI7025 | +80.61 | 0.00 | Hypothetical                   | Conserved hypothetical protein                   | hypothetical protein blI7025                        |
| blr0497 | +11.90 | 0.00 | Hypothetical                   | Conserved hypothetical protein                   | hypothetical protein blr0497                        |
| blI2471 | +9.76  | 0.00 | Hypothetical                   | Conserved hypothetical protein                   | hypothetical protein blI2471                        |
| blI0174 | +9.31  | 0.00 | Hypothetical                   | Conserved hypothetical protein                   | hypothetical protein blI0174                        |
| bsr6520 | +6.82  | 0.00 | Hypothetical                   | Conserved hypothetical protein                   | hypothetical protein bsr6520                        |
| blI4927 | +6.26  | 0.00 | Hypothetical                   | Conserved hypothetical protein                   | hypothetical protein blI4927                        |
| bsr6686 | +4.74  | 0.00 | Hypothetical                   | Conserved hypothetical protein                   | hypothetical protein bsr6686                        |
| blI7551 | +4.48  | 0.00 | Hypothetical                   | No similarity                                    | hypothetical protein blI7551                        |
| bsr3580 | +4.47  | 0.00 | Hypothetical                   | No similarity                                    | hypothetical protein bsr3580                        |
| blI2590 | +4.05  | 0.00 | Hypothetical                   | Conserved hypothetical protein                   | hypothetical protein blI2590                        |
| blr3843 | +3.90  | 0.00 | Hypothetical                   | No similarity                                    | hypothetical protein blr3843                        |
| blI7022 | +3.89  | 0.00 | Hypothetical                   | No similarity                                    | hypothetical protein blI7022                        |
| blI2365 | +3.80  | 0.00 | Hypothetical                   | No similarity                                    | hypothetical protein blI2365                        |
| bsI5002 | +3.75  | 0.00 | Hypothetical                   | No similarity                                    | hypothetical protein bsI5002                        |
| blr4188 | +3.73  | 0.00 | Hypothetical                   | Conserved hypothetical protein                   | hypothetical protein blr4188                        |
| bsI8314 | +3.58  | 0.00 | Hypothetical                   | No similarity                                    | hypothetical protein bsI8314                        |
| blr6074 | +3.52  | 0.00 | Hypothetical                   | Conserved hypothetical protein                   | hypothetical protein blr6074                        |
| bsr6521 | +3.50  | 0.00 | Hypothetical                   | Conserved hypothetical protein                   | hypothetical protein bsr6521                        |
| blI5048 | +3.48  | 0.00 | Hypothetical                   | No similarity                                    | hypothetical protein blI5048                        |
| bsr7110 | +3.48  | 0.00 | Hypothetical                   | Conserved hypothetical protein                   | hypothetical protein bsr7110                        |
| blr4538 | +3.29  | 0.00 | Hypothetical                   | Conserved hypothetical protein                   | hypothetical protein blr4538                        |
| blr1072 | +3.27  | 0.00 | Hypothetical                   | Conserved hypothetical protein                   | hypothetical protein blr1072                        |
| blI4833 | +3.13  | 0.00 | Hypothetical                   | No similarity                                    | hypothetical protein blI4833                        |
| blI4718 | +3.03  | 0.00 | Hypothetical                   | No similarity                                    | hypothetical protein blI4718                        |
| blI6069 | +3.03  | 0.00 | Hypothetical                   | Conserved hypothetical protein                   | hypothetical protein blI6069                        |
| blr4840 | +3.02  | 0.00 | Hypothetical                   | No similarity                                    | hypothetical protein blr4840                        |
| blr5792 | +2.96  | 0.00 | Hypothetical                   | Conserved hypothetical protein                   | hypothetical protein blr5792                        |
| blI0061 | +2.82  | 0.00 | Hypothetical                   | No similarity                                    | hypothetical protein blI0061                        |
| bsr5938 | +2.80  | 0.00 | Hypothetical                   | Conserved hypothetical protein                   | hypothetical protein bsr5938                        |
| blr7331 | +2.78  | 0.00 | Hypothetical                   | Conserved hypothetical protein                   | hypothetical protein blr7331                        |
| blI4958 | +2.75  | 0.00 | Hypothetical                   | Conserved hypothetical protein                   | hypothetical protein blI4958                        |
| blr7102 | +2.74  | 0.00 | Hypothetical                   | No similarity                                    | hypothetical protein blr7102                        |
| blr7975 | +2.66  | 0.00 | Hypothetical                   | Conserved hypothetical protein                   | hypothetical protein blr7975                        |
| blr0951 | +2.60  | 0.00 | Hypothetical                   | Conserved hypothetical protein                   | hypothetical protein blr0951                        |
| bsI4703 | +2.52  | 0.00 | Hypothetical                   | Conserved hypothetical protein                   | hypothetical protein bsI4703                        |
| blI0839 | +2.48  | 0.00 | Hypothetical                   | Conserved hypothetical protein                   | hypothetical protein blI0839                        |
| blI7057 | +2.46  | 0.00 | Hypothetical                   | Conserved hypothetical protein                   | hypothetical protein blI7057                        |
| blI2551 | +2.46  | 0.00 | Hypothetical                   | Conserved hypothetical protein                   | hypothetical protein blI2551                        |
| bsI6675 | +2.45  | 0.00 | Hypothetical                   | No similarity                                    | hypothetical protein bsI6675                        |
| blI3890 | +2.43  | 0.00 | Hypothetical                   | No similarity                                    | hypothetical protein blI3890                        |
| blr3632 | +2.40  | 0.00 | Hypothetical                   | Conserved hypothetical protein                   | hypothetical protein blr3632                        |
| bsI1161 | +2.39  | 0.00 | Hypothetical                   | No similarity                                    | hypothetical protein bsI1161                        |
| blI0657 | +2.39  | 0.00 | Hypothetical                   | Conserved hypothetical protein                   | hypothetical protein blI0657                        |
| blr2857 | +2.39  | 0.00 | Hypothetical                   | Conserved hypothetical protein                   | hypothetical protein blr2857                        |
| blr0396 | +2.37  | 0.00 | Hypothetical                   | Conserved hypothetical protein                   | hypothetical protein blr0396                        |
| blr4768 | +2.36  | 0.05 | Hypothetical                   | No similarity                                    | hypothetical protein blr4768                        |
| blr5847 | +2.35  | 0.00 | Hypothetical                   | Conserved hypothetical protein                   | hypothetical protein blr5847                        |
| blr0084 | +2.34  | 0.17 | Hypothetical                   | Conserved hypothetical protein                   | hypothetical protein blr0084                        |
| bsr4834 | +2.32  | 0.00 | Hypothetical                   | No similarity                                    | hypothetical protein bsr4834                        |
| blI2824 | +2.29  | 0.00 | Hypothetical                   | No similarity                                    | hypothetical protein blI2824                        |
| bsI4593 | +2.29  | 0.00 | Hypothetical                   | No similarity                                    | hypothetical protein bsI4593                        |
| blr2611 | +2.28  | 0.00 | Hypothetical                   | No similarity                                    | hypothetical protein blr2611                        |

|         |       |      |              |                                |                              |
|---------|-------|------|--------------|--------------------------------|------------------------------|
| blI0176 | +2.25 | 0.00 | Hypothetical | No similarity                  | hypothetical protein blI0176 |
| blr1324 | +2.23 | 0.00 | Hypothetical | Conserved hypothetical protein | hypothetical protein blr1324 |
| bsr1458 | +2.21 | 0.00 | Hypothetical | Conserved hypothetical protein | hypothetical protein bsr1458 |
| blI6793 | +2.21 | 0.00 | Hypothetical | Conserved hypothetical protein | hypothetical protein blI6793 |
| blr2668 | +2.19 | 0.00 | Hypothetical | Conserved hypothetical protein | hypothetical protein blr2668 |
| blr0644 | +2.18 | 0.00 | Hypothetical | Conserved hypothetical protein | hypothetical protein blr0644 |
| blr3585 | +2.18 | 0.00 | Hypothetical | No similarity                  | hypothetical protein blr3585 |
| blr2409 | +2.18 | 0.62 | Hypothetical | Conserved hypothetical protein | hypothetical protein blr2409 |
| blr5318 | +2.17 | 0.00 | Hypothetical | No similarity                  | hypothetical protein blr5318 |
| blr4686 | +2.16 | 0.00 | Hypothetical | Conserved hypothetical protein | hypothetical protein blr4686 |
| blr4652 | +2.15 | 0.00 | Hypothetical | Conserved hypothetical protein | hypothetical protein blr4652 |
| blI4270 | +2.13 | 0.00 | Hypothetical | No similarity                  | hypothetical protein blI4270 |
| blr1614 | +2.13 | 0.00 | Hypothetical | Conserved hypothetical protein | hypothetical protein blr1614 |
| blI6032 | +2.12 | 0.00 | Hypothetical | Conserved hypothetical protein | hypothetical protein blI6032 |
| blI4548 | +2.10 | 0.05 | Hypothetical | Conserved hypothetical protein | hypothetical protein blI4548 |
| blI7294 | +2.10 | 0.00 | Hypothetical | Conserved hypothetical protein | hypothetical protein blI7294 |
| blI0524 | +2.10 | 0.00 | Hypothetical | Conserved hypothetical protein | hypothetical protein blI0524 |
| blr4566 | +2.08 | 0.05 | Hypothetical | Conserved hypothetical protein | hypothetical protein blr4566 |
| blI7241 | +2.08 | 0.00 | Hypothetical | No similarity                  | hypothetical protein blI7241 |
| bsr7348 | +2.07 | 0.00 | Hypothetical | No similarity                  | hypothetical protein bsr7348 |
| blr5788 | +2.07 | 0.00 | Hypothetical | Conserved hypothetical protein | hypothetical protein blr5788 |
| blI2215 | +2.07 | 0.00 | Hypothetical | Conserved hypothetical protein | hypothetical protein blI2215 |
| blr2408 | +2.07 | 0.00 | Hypothetical | Conserved hypothetical protein | hypothetical protein blr2408 |
| blr4111 | +2.05 | 0.00 | Hypothetical | Conserved hypothetical protein | hypothetical protein blr4111 |
| blr1487 | +2.05 | 0.00 | Hypothetical | Conserved hypothetical protein | hypothetical protein blr1487 |
| blr6028 | +2.05 | 0.17 | Hypothetical | No similarity                  | hypothetical protein blr6028 |
| bsI0170 | +2.04 | 0.00 | Hypothetical | Conserved hypothetical protein | hypothetical protein bsI0170 |
| bsI7992 | +2.04 | 0.00 | Hypothetical | Conserved hypothetical protein | hypothetical protein bsI7992 |
| bsI6289 | +2.04 | 0.00 | Hypothetical | No similarity                  | hypothetical protein bsI6289 |
| blr3063 | +2.03 | 0.00 | Hypothetical | No similarity                  | hypothetical protein blr3063 |
| blr0624 | +2.03 | 0.00 | Hypothetical | Conserved hypothetical protein | hypothetical protein blr0624 |
| blI6547 | +2.02 | 0.00 | Hypothetical | No similarity                  | hypothetical protein blI6547 |
| blr3886 | +2.00 | 0.00 | Hypothetical | Conserved hypothetical protein | hypothetical protein blr3886 |
| blI4089 | -2.00 | 0.00 | Hypothetical | No similarity                  | hypothetical protein blI4089 |
| blr1571 | -2.00 | 0.00 | Hypothetical | No similarity                  | hypothetical protein blr1571 |
| blr5095 | -2.01 | 0.00 | Hypothetical | Conserved hypothetical protein | hypothetical protein blr5095 |
| blI3228 | -2.01 | 0.00 | Hypothetical | No similarity                  | hypothetical protein blI3228 |
| blI2375 | -2.01 | 0.00 | Hypothetical | No similarity                  | hypothetical protein blI2375 |
| blr3905 | -2.01 | 0.00 | Hypothetical | Conserved hypothetical protein | hypothetical protein blr3905 |
| bsr7779 | -2.02 | 0.00 | Hypothetical | No similarity                  | hypothetical protein bsr7779 |
| blr2372 | -2.03 | 0.00 | Hypothetical | No similarity                  | hypothetical protein blr2372 |
| blr2592 | -2.04 | 0.00 | Hypothetical | No similarity                  | hypothetical protein blr2592 |
| blr7305 | -2.04 | 0.00 | Hypothetical | No similarity                  | hypothetical protein blr7305 |
| bsI0168 | -2.04 | 0.00 | Hypothetical | No similarity                  | hypothetical protein bsI0168 |
| blr1249 | -2.05 | 0.00 | Hypothetical | Conserved hypothetical protein | hypothetical protein blr1249 |
| blI2452 | -2.05 | 0.00 | Hypothetical | No similarity                  | hypothetical protein blI2452 |
| blr0433 | -2.06 | 0.00 | Hypothetical | Conserved hypothetical protein | hypothetical protein blr0433 |
| bsr4236 | -2.07 | 0.00 | Hypothetical | No similarity                  | hypothetical protein bsr4236 |
| blr4176 | -2.07 | 0.00 | Hypothetical | No similarity                  | hypothetical protein blr4176 |
| bsr2601 | -2.10 | 0.00 | Hypothetical | No similarity                  | hypothetical protein bsr2601 |
| blr0058 | -2.10 | 0.00 | Hypothetical | No similarity                  | hypothetical protein blr0058 |
| blr7950 | -2.10 | 0.00 | Hypothetical | Conserved hypothetical protein | hypothetical protein blr7950 |
| bsI5509 | -2.10 | 0.00 | Hypothetical | No similarity                  | hypothetical protein bsI5509 |
| bsI7464 | -2.10 | 0.00 | Hypothetical | Conserved hypothetical protein | hypothetical protein bsI7464 |
| blr4971 | -2.11 | 0.00 | Hypothetical | Conserved hypothetical protein | hypothetical protein blr4971 |
| bsI2406 | -2.11 | 0.00 | Hypothetical | Conserved hypothetical protein | hypothetical protein bsI2406 |
| blr4285 | -2.11 | 0.00 | Hypothetical | Conserved hypothetical protein | hypothetical protein blr4285 |
| blI1465 | -2.11 | 0.00 | Hypothetical | Conserved hypothetical protein | hypothetical protein blI1465 |
| blI6166 | -2.12 | 0.00 | Hypothetical | No similarity                  | hypothetical protein blI6166 |
| blr0908 | -2.13 | 0.00 | Hypothetical | Conserved hypothetical protein | hypothetical protein blr0908 |
| blr1468 | -2.13 | 0.00 | Hypothetical | Conserved hypothetical protein | hypothetical protein blr1468 |
| blI1342 | -2.14 | 0.00 | Hypothetical | Conserved hypothetical protein | hypothetical protein blI1342 |
| blr7883 | -2.15 | 0.00 | Hypothetical | No similarity                  | hypothetical protein blr7883 |
| blI7425 | -2.15 | 0.00 | Hypothetical | Conserved hypothetical protein | hypothetical protein blI7425 |
| blr1157 | -2.15 | 0.00 | Hypothetical | Conserved hypothetical protein | hypothetical protein blr1157 |
| bsI0054 | -2.16 | 0.00 | Hypothetical | Conserved hypothetical protein | hypothetical protein bsI0054 |
| blr8065 | -2.17 | 0.00 | Hypothetical | Conserved hypothetical protein | hypothetical protein blr8065 |
| blr0547 | -2.18 | 0.00 | Hypothetical | Conserved hypothetical protein | hypothetical protein blr0547 |
| blI0737 | -2.18 | 0.00 | Hypothetical | Conserved hypothetical protein | hypothetical protein blI0737 |
| blr6922 | -2.18 | 0.00 | Hypothetical | No similarity                  | hypothetical protein blr6922 |
| blI4432 | -2.19 | 0.00 | Hypothetical | Conserved hypothetical protein | hypothetical protein blI4432 |
| blI1669 | -2.19 | 0.00 | Hypothetical | Conserved hypothetical protein | hypothetical protein blI1669 |
| blr6132 | -2.21 | 0.00 | Hypothetical | No similarity                  | hypothetical protein blr6132 |
| blI2700 | -2.21 | 0.00 | Hypothetical | Conserved hypothetical protein | hypothetical protein blI2700 |
| blI7189 | -2.21 | 0.00 | Hypothetical | Conserved hypothetical protein | hypothetical protein blI7189 |
| blI8048 | -2.22 | 0.00 | Hypothetical | No similarity                  | hypothetical protein blI8048 |
| blI2378 | -2.23 | 0.00 | Hypothetical | No similarity                  | hypothetical protein blI2378 |
| blr5558 | -2.24 | 0.00 | Hypothetical | Conserved hypothetical protein | hypothetical protein blr5558 |
| blr4223 | -2.25 | 0.00 | Hypothetical | No similarity                  | hypothetical protein blr4223 |
| bsI1405 | -2.26 | 0.00 | Hypothetical | Conserved hypothetical protein | hypothetical protein bsI1405 |
| blI3711 | -2.26 | 0.00 | Hypothetical | Conserved hypothetical protein | hypothetical protein blI3711 |
| blr7860 | -2.26 | 0.00 | Hypothetical | Conserved hypothetical protein | hypothetical protein blr7860 |
| blI7976 | -2.27 | 0.00 | Hypothetical | Conserved hypothetical protein | hypothetical protein blI7976 |
| blr3500 | -2.28 | 0.00 | Hypothetical | Conserved hypothetical protein | hypothetical protein blr3500 |
| bsr6752 | -2.28 | 0.00 | Hypothetical | Conserved hypothetical protein | hypothetical protein bsr6752 |
| bsr5590 | -2.28 | 0.00 | Hypothetical | Conserved hypothetical protein | hypothetical protein bsr5590 |
| blr6772 | -2.29 | 0.00 | Hypothetical | Conserved hypothetical protein | hypothetical protein blr6772 |
| blI6165 | -2.29 | 0.00 | Hypothetical | Conserved hypothetical protein | hypothetical protein blI6165 |
| blr3169 | -2.31 | 0.00 | Hypothetical | Conserved hypothetical protein | hypothetical protein blr3169 |
| blr3159 | -2.33 | 0.00 | Hypothetical | Conserved hypothetical protein | hypothetical protein blr3159 |
| bsI6560 | -2.34 | 0.00 | Hypothetical | Conserved hypothetical protein | hypothetical protein bsI6560 |
| blI7080 | -2.35 | 0.00 | Hypothetical | No similarity                  | hypothetical protein blI7080 |
| blI4739 | -2.35 | 0.00 | Hypothetical | Conserved hypothetical protein | hypothetical protein blI4739 |
| blI1291 | -2.35 | 0.00 | Hypothetical | No similarity                  | hypothetical protein blI1291 |
| blI5555 | -2.36 | 0.00 | Hypothetical | Conserved hypothetical protein | hypothetical protein blI5555 |
| blI2600 | -2.39 | 0.00 | Hypothetical | No similarity                  | hypothetical protein blI2600 |
| blI5076 | -2.40 | 0.00 | Hypothetical | Conserved hypothetical protein | hypothetical protein blI5076 |
| bsI4014 | -2.40 | 0.00 | Hypothetical | No similarity                  | hypothetical protein bsI4014 |
| blr7534 | -2.42 | 0.00 | Hypothetical | Conserved hypothetical protein | hypothetical protein blr7534 |

|         |        |      |              |                                |                              |
|---------|--------|------|--------------|--------------------------------|------------------------------|
| blI4278 | -2.42  | 0.00 | Hypothetical | No similarity                  | hypothetical protein blI4278 |
| blI6168 | -2.42  | 0.00 | Hypothetical | Conserved hypothetical protein | hypothetical protein blI6168 |
| blI0014 | -2.43  | 0.00 | Hypothetical | No similarity                  | hypothetical protein blI0014 |
| blI4354 | -2.43  | 0.00 | Hypothetical | Conserved hypothetical protein | hypothetical protein blI4354 |
| blI5085 | -2.45  | 0.00 | Hypothetical | No similarity                  | hypothetical protein blI5085 |
| blr5174 | -2.46  | 0.00 | Hypothetical | Conserved hypothetical protein | hypothetical protein blr5174 |
| blI7046 | -2.48  | 0.00 | Hypothetical | No similarity                  | hypothetical protein blI7046 |
| bsI5035 | -2.52  | 0.00 | Hypothetical | Conserved hypothetical protein | hypothetical protein bsI5035 |
| blr4226 | -2.53  | 0.00 | Hypothetical | Conserved hypothetical protein | hypothetical protein blr4226 |
| blr2597 | -2.53  | 0.00 | Hypothetical | No similarity                  | hypothetical protein blr2597 |
| blI7511 | -2.54  | 0.00 | Hypothetical | No similarity                  | hypothetical protein blI7511 |
| blI2537 | -2.55  | 0.00 | Hypothetical | Conserved hypothetical protein | hypothetical protein blI2537 |
| bsI6734 | -2.56  | 0.00 | Hypothetical | Conserved hypothetical protein | hypothetical protein bsI6734 |
| blr7465 | -2.57  | 0.00 | Hypothetical | Conserved hypothetical protein | hypothetical protein blr7465 |
| blI7148 | -2.58  | 0.00 | Hypothetical | Conserved hypothetical protein | hypothetical protein blI7148 |
| blr7436 | -2.58  | 0.00 | Hypothetical | Conserved hypothetical protein | hypothetical protein blr7436 |
| bsI1312 | -2.59  | 0.00 | Hypothetical | No similarity                  | hypothetical protein bsI1312 |
| bsr4726 | -2.60  | 0.00 | Hypothetical | No similarity                  | hypothetical protein bsr4726 |
| blI7711 | -2.65  | 0.00 | Hypothetical | No similarity                  | hypothetical protein blI7711 |
| blr4022 | -2.67  | 0.00 | Hypothetical | No similarity                  | hypothetical protein blr4022 |
| blr7652 | -2.67  | 0.00 | Hypothetical | Conserved hypothetical protein | hypothetical protein blr7652 |
| blI6649 | -2.69  | 0.00 | Hypothetical | Conserved hypothetical protein | hypothetical protein blI6649 |
| bsI2574 | -2.70  | 0.00 | Hypothetical | No similarity                  | hypothetical protein bsI2574 |
| blI5629 | -2.71  | 0.00 | Hypothetical | Conserved hypothetical protein | hypothetical protein blI5629 |
| bsr4248 | -2.73  | 0.00 | Hypothetical | No similarity                  | hypothetical protein bsr4248 |
| blI6993 | -2.74  | 0.00 | Hypothetical | Conserved hypothetical protein | hypothetical protein blI6993 |
| blI4722 | -2.74  | 0.00 | Hypothetical | Conserved hypothetical protein | hypothetical protein blI4722 |
| blI2411 | -2.80  | 0.00 | Hypothetical | No similarity                  | hypothetical protein blI2411 |
| bsI0032 | -2.80  | 0.00 | Hypothetical | No similarity                  | hypothetical protein bsI0032 |
| bsr1472 | -2.82  | 0.00 | Hypothetical | Conserved hypothetical protein | hypothetical protein bsr1472 |
| bsr4225 | -2.82  | 0.00 | Hypothetical | No similarity                  | hypothetical protein bsr4225 |
| blI4293 | -2.83  | 0.00 | Hypothetical | Conserved hypothetical protein | hypothetical protein blI4293 |
| blr4215 | -2.84  | 0.00 | Hypothetical | No similarity                  | hypothetical protein blr4215 |
| bsI2602 | -2.85  | 0.00 | Hypothetical | Conserved hypothetical protein | hypothetical protein bsI2602 |
| blr2787 | -2.86  | 0.00 | Hypothetical | No similarity                  | hypothetical protein blr2787 |
| bsr7048 | -2.86  | 0.00 | Hypothetical | Conserved hypothetical protein | hypothetical protein bsr7048 |
| bsI2596 | -2.92  | 0.00 | Hypothetical | No similarity                  | hypothetical protein bsI2596 |
| blr4053 | -2.97  | 0.00 | Hypothetical | Conserved hypothetical protein | hypothetical protein blr4053 |
| blr6682 | -2.97  | 0.00 | Hypothetical | Conserved hypothetical protein | hypothetical protein blr6682 |
| bsI7915 | -3.03  | 0.00 | Hypothetical | Conserved hypothetical protein | hypothetical protein bsI7915 |
| blI2851 | -3.04  | 0.00 | Hypothetical | Conserved hypothetical protein | hypothetical protein blI2851 |
| blr5102 | -3.06  | 0.00 | Hypothetical | Conserved hypothetical protein | hypothetical protein blr5102 |
| blI7406 | -3.08  | 0.00 | Hypothetical | Conserved hypothetical protein | hypothetical protein blI7406 |
| blI3066 | -3.12  | 0.00 | Hypothetical | No similarity                  | hypothetical protein blI3066 |
| blr5561 | -3.13  | 0.00 | Hypothetical | No similarity                  | hypothetical protein blr5561 |
| blI5859 | -3.18  | 0.00 | Hypothetical | No similarity                  | hypothetical protein blI5859 |
| blI3421 | -3.21  | 0.00 | Hypothetical | No similarity                  | hypothetical protein blI3421 |
| bsI7781 | -3.24  | 0.00 | Hypothetical | No similarity                  | hypothetical protein bsI7781 |
| blI2461 | -3.25  | 0.00 | Hypothetical | Conserved hypothetical protein | hypothetical protein blI2461 |
| bsI1473 | -3.27  | 0.00 | Hypothetical | Conserved hypothetical protein | hypothetical protein bsI1473 |
| blI3009 | -3.33  | 0.00 | Hypothetical | Conserved hypothetical protein | hypothetical protein blI3009 |
| bsr7049 | -3.36  | 0.00 | Hypothetical | No similarity                  | hypothetical protein bsr7049 |
| blr2846 | -3.38  | 0.00 | Hypothetical | No similarity                  | hypothetical protein blr2846 |
| bsI6114 | -3.39  | 0.00 | Hypothetical | Conserved hypothetical protein | hypothetical protein bsI6114 |
| bsI6119 | -3.44  | 0.00 | Hypothetical | No similarity                  | hypothetical protein bsI6119 |
| bsr7796 | -3.46  | 0.00 | Hypothetical | Conserved hypothetical protein | hypothetical protein bsr7796 |
| blI4579 | -3.46  | 0.00 | Hypothetical | No similarity                  | hypothetical protein blI4579 |
| blI3023 | -3.60  | 0.00 | Hypothetical | Conserved hypothetical protein | hypothetical protein blI3023 |
| blr5554 | -3.68  | 0.00 | Hypothetical | Conserved hypothetical protein | hypothetical protein blr5554 |
| blI2228 | -3.81  | 0.00 | Hypothetical | No similarity                  | hypothetical protein blI2228 |
| blr8063 | -3.85  | 0.00 | Hypothetical | No similarity                  | hypothetical protein blr8063 |
| blI0912 | -3.87  | 0.00 | Hypothetical | Conserved hypothetical protein | hypothetical protein blI0912 |
| blr2889 | -3.90  | 0.00 | Hypothetical | Conserved hypothetical protein | hypothetical protein blr2889 |
| bsr4235 | -3.98  | 0.00 | Hypothetical | No similarity                  | hypothetical protein bsr4235 |
| bsr5347 | -4.16  | 0.00 | Hypothetical | Conserved hypothetical protein | hypothetical protein bsr5347 |
| blr4214 | -4.24  | 0.00 | Hypothetical | No similarity                  | hypothetical protein blr4214 |
| bsr5508 | -4.40  | 0.00 | Hypothetical | Conserved hypothetical protein | hypothetical protein bsr5508 |
| blr4162 | -4.50  | 0.00 | Hypothetical | Conserved hypothetical protein | hypothetical protein blr4162 |
| blI1466 | -4.76  | 0.00 | Hypothetical | No similarity                  | hypothetical protein blI1466 |
| blr6123 | -4.84  | 0.00 | Hypothetical | No similarity                  | hypothetical protein blr6123 |
| blr3681 | -4.96  | 0.00 | Hypothetical | Conserved hypothetical protein | hypothetical protein blr3681 |
| blr1496 | -5.12  | 0.00 | Hypothetical | No similarity                  | hypothetical protein blr1496 |
| blr6774 | -5.28  | 0.00 | Hypothetical | Conserved hypothetical protein | hypothetical protein blr6774 |
| blI2363 | -5.58  | 0.00 | Hypothetical | No similarity                  | hypothetical protein blI2363 |
| bsr7643 | -6.18  | 0.00 | Hypothetical | Conserved hypothetical protein | hypothetical protein bsr7643 |
| blI7395 | -6.27  | 0.00 | Hypothetical | Conserved hypothetical protein | hypothetical protein blI7395 |
| blr5502 | -7.12  | 0.00 | Hypothetical | Conserved hypothetical protein | hypothetical protein blr5502 |
| bsI4407 | -7.15  | 0.00 | Hypothetical | No similarity                  | hypothetical protein bsI4407 |
| blr2887 | -19.66 | 0.00 | Hypothetical | Conserved hypothetical protein | hypothetical protein blr2887 |
| blI5155 | -26.11 | 0.00 | Hypothetical | Conserved hypothetical protein | hypothetical protein blI5155 |

---
